# Supplementary material
Source: PubMed Central journal article supplement (PMC4336171)
Supplement: NIHMS663051-supplement-supplement_1.pdf [file NIHMS663051-supplement-supplement_1.pdf]

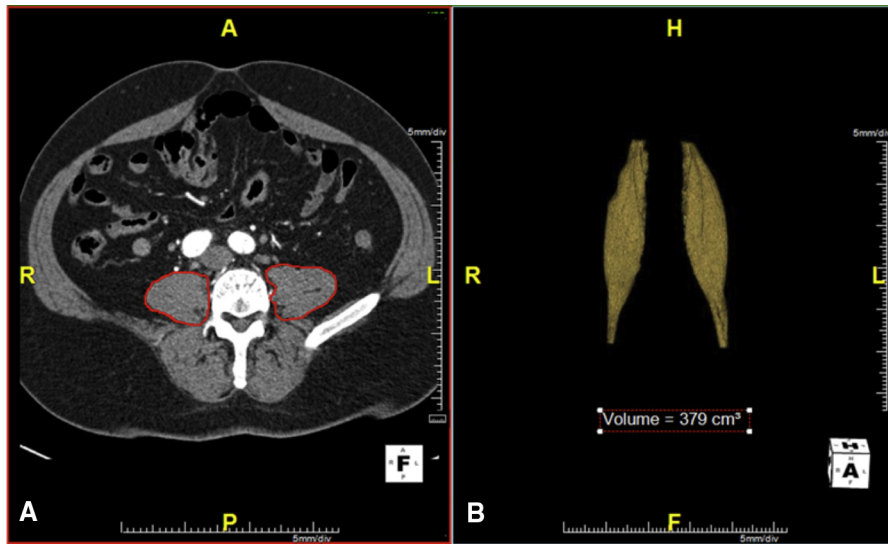

**FIGURE E1.** Representation of total psoas volume (TPV) measurement. A, Axial image of abdomen at L4 level, with red line outlining psoas muscles bilaterally. B, Three-dimensional image of bilateral psoas muscles, including calculation of TPV, after reconstruction on 3-dimensional workstation.

ACD

**TABLE E1. Frailty indicators**

| Component                   | Frail (n = 148) | Not frail (n = 426) |
|-----------------------------|-----------------|---------------------|
| Age >70 y                   | 66 (44.6)       | 26 (6.1)            |
| BMI <18.5 kg/m <sup>2</sup> | 7 (4.7)         | 5 (1.1)             |
| History of stroke           | 25 (16.9)       | 15 (3.5)            |
| TPV in lower quartile       | 46 (31.1)       | 20 (4.7)            |
| Anemia                      | 112 (75.7)      | 60 (14.1)           |
| Hypoalbuminemia             | 104 (70.3)      | 20 (4.7)            |

Data presented as n (%). Anemia defined as <12.0 g/dL for women or <13.0 g/dL for men. Hypoalbuminemia defined as <3.5 g/dL. *BMI*, Body mass index; *TPV*, total psoas volume.

**TABLE E2. Frailty scores**

| Frailty score | Frail (n = 148) | Not frail (n = 426) |
|---------------|-----------------|---------------------|
| 0             | NA              | 280 (65.7)          |
| 1             | NA              | 146 (34.3)          |
| 2             | 93 (62.8)       | NA                  |
| 3             | 47 (31.8)       | NA                  |
| 4             | 7 (4.7)         | NA                  |
| 5             | 1 (0.7)         | NA                  |
| 6             | 0 (0)           | NA                  |

Data presented as n (%). *NA*, Not applicable.
